# Supplementary material
Source: publisher figshare collection journal article supplement (https://acs.figshare.com/ndownloader/files/15631250)
Supplement: Supplementary file 1 [file 15631250]

## Sheet: Sheet1
Assay sample	Compound name	Dose level	Administered dose (milligram per kilogram)	Time points (day)	Pathological classification
3017105007	lomustine	High	6	15	minimal
3017096018	ethinylestradiol	Low	1	4	minimal
3017163006	chloramphenicol	Control	0	15	control
3017574012	puromycin aminonucleoside	High	40	4	slight
3017432007	fenofibrate	High	1000	8	slight
3017176027	imipramine	Middle	30	29	minimal
3017399014	ethambutol	Control	0	8	control
3017724008	gemfibrozil	Control	0	15	control
3017580005	puromycin aminonucleoside	Middle	12	15	moderate
3017428009	promethazine	Control	0	4	control
3017454012	benziodarone	Low	30	4	minimal
3017759016	azathioprine	Control	0	15	control
3017709023	WY-14643	Middle	30	8	minimal
3017457001	bendazac	Control	0	8	control
3017713029	naphthyl isothiocyanate	Control	0	15	control
3017424020	papaverine	High	400	4	slight
3017193002	amitriptyline	Control	0	8	control
3017651013	methapyrilene	Control	0	29	control
3017657004	ethionine	Control	0	29	minimal
3017736017	coumarin	High	150	15	minimal
3017096016	ethinylestradiol	Control	0	4	control
3017713004	naphthyl isothiocyanate	Control	0	4	control
3017016023	methyltestosterone	High	300	15	slight
3017534018	nitrosodiethylamine	Control	0	15	control
3017708003	WY-14643	Control	0	29	minimal
3017707026	WY-14643	Middle	30	15	minimal
3017495001	fenofibrate	Control	0	15	control
3017503017	trimethadione	Control	0	29	control
3017096022	ethinylestradiol	Middle	3	4	minimal
3017648015	methapyrilene	High	100	8	slight
3017719003	hexachlorobenzene	High	300	4	minimal
3017554005	ethionamide	Middle	100	4	minimal
3017533005	nitrosodiethylamine	High	30	8	minimal
3017105006	lomustine	High	6	15	minimal
3017495013	fenofibrate	Control	0	29	control
3017734018	coumarin	High	150	8	minimal
3017503018	trimethadione	Control	0	29	control
3017495017	fenofibrate	Low	10	29	minimal
3017099017	ethinylestradiol	Control	0	8	minimal
3017096015	ethinylestradiol	Control	0	4	control
3017574011	puromycin aminonucleoside	High	40	4	slight
3017431024	fenofibrate	High	1000	4	minimal
3017298024	diltiazem	High	800	8	minimal
3017554013	ethionamide	Middle	100	8	slight
3017707009	indomethacin	Control	0	8	control
3017163028	chloramphenicol	High	1000	29	slight
3017747005	cyclophosphamide	Control	0	29	slight
3017431028	fenofibrate	Control	0	8	control
3017574002	puromycin aminonucleoside	Control	0	4	control
3017709018	WY-14643	Control	0	8	control
3017086009	ethinylestradiol	High	10	29	moderate
3017510029	ethionamide	High	300	8	slight
3017191006	amitriptyline	Low	15	4	minimal
3017655020	ethionine	Middle	80	8	minimal
3017083022	ethinylestradiol	Low	1	15	minimal
3017739024	chlorpromazine	Control	0	29	control
3017495022	fenofibrate	High	1000	29	moderate
3017718025	hexachlorobenzene	Control	0	4	control
3017655002	ethionine	Control	0	4	minimal
3017105026	methyldopa	Control	0	4	control
3017124012	iproniazid	Control	0	29	control
3017715025	amiodarone	High	200	15	minimal
3017093027	monocrotaline	Middle	10	15	slight
3017105020	methyldopa	Middle	200	4	minimal
3017398024	ethambutol	Control	0	15	control
3017739029	chlorpromazine	Middle	15	29	minimal
3017724009	gemfibrozil	Control	0	15	control
3017724030	gemfibrozil	High	300	29	minimal
3017428011	promethazine	Control	0	4	control
3017454019	benziodarone	Control	0	8	minimal
3017724020	gemfibrozil	Control	0	29	minimal
3017192020	amitriptyline	Middle	50	29	slight
3017733014	phenytoin	Control	0	29	control
3017495014	fenofibrate	Control	0	29	control
3017094003	chlormezanone	Control	0	4	control
3017501023	trimethadione	High	500	4	slight
3017503016	trimethadione	Control	0	29	control
3017656029	ethionine	High	250	15	moderate
3017713028	naphthyl isothiocyanate	Control	0	15	control
3017176018	imipramine	Middle	30	15	minimal
3017300007	diltiazem	Control	0	15	control
3017648008	methapyrilene	Control	0	8	control
3017163014	chloramphenicol	Middle	300	15	minimal
3017736008	coumarin	Control	0	15	control
3017399015	ethambutol	Control	0	8	control
3017648001	methapyrilene	Middle	30	4	slight
3017511022	ethionamide	Control	0	29	minimal
3017732030	phenytoin	High	600	8	slight
3017096024	ethinylestradiol	High	10	4	minimal
3017428010	promethazine	Control	0	4	control
3017124013	iproniazid	Control	0	29	control
3017736007	coumarin	Control	0	15	control
3017083019	ethinylestradiol	Control	0	15	slight
3017554009	ethionamide	Control	0	8	minimal
3017086001	ethinylestradiol	Control	0	29	control
3017574015	puromycin aminonucleoside	Control	0	8	control
3017728027	phenylbutazone	Middle	60	29	slight
3017734008	coumarin	Control	0	8	control
3017532027	nitrosodiethylamine	Control	0	8	control
3017083028	ethinylestradiol	High	10	15	slight
3017176026	imipramine	Middle	30	29	minimal
3017192025	amitriptyline	Low	15	4	minimal
3017714009	naphthyl isothiocyanate	High	15	15	slight
3017454020	benziodarone	Control	0	8	minimal
3017454009	benziodarone	Control	0	4	minimal
3017408001	ethambutol	Control	0	15	control
3017495018	fenofibrate	Low	10	29	minimal
3017456020	bendazac	Control	0	4	control
3017300016	diltiazem	High	800	15	minimal
3017648006	methapyrilene	Control	0	8	control
3017456029	bendazac	High	300	4	slight
3017124014	iproniazid	Control	0	29	control
3017554012	ethionamide	Middle	100	8	slight
3017174006	nitrofurazone	High	100	29	minimal
3017456023	bendazac	Low	30	4	minimal
3017400007	ethambutol	High	1000	29	moderate
3017725002	gemfibrozil	Control	0	4	minimal
3017655015	ethionine	Control	0	8	slight
3017300015	diltiazem	Middle	240	15	minimal
3017456026	bendazac	Middle	100	4	minimal
3017495023	fenofibrate	High	1000	29	moderate
3017725004	gemfibrozil	Low	30	4	slight
3017179023	chloramphenicol	Control	0	29	control
3017300026	diltiazem	Middle	240	29	minimal
3017300007	diltiazem	Control	0	15	control
3017503027	trimethadione	High	500	29	minimal
3017193010	amitriptyline	Middle	50	8	minimal
3017166012	naproxen	High	60	4	slight
3017655003	ethionine	Control	0	4	minimal
3017707007	indomethacin	Control	0	8	control
3017724020	gemfibrozil	Control	0	29	minimal
3017408002	ethambutol	Control	0	15	control
3017173016	nitrofurazone	Control	0	15	minimal
3017399015	ethambutol	Control	0	8	control
3017456022	bendazac	Low	30	4	minimal
3017094018	chlormezanone	Low	50	8	minimal
3017192022	amitriptyline	High	150	29	moderate
3017192013	amitriptyline	Control	0	29	control
3017718027	hexachlorobenzene	Low	30	4	minimal
3017739013	chlorpromazine	Control	0	15	control
3017736029	coumarin	High	150	29	minimal
3017724016	gemfibrozil	High	300	15	minimal
3017664025	thioacetamide	Control	0	4	control
3017665001	thioacetamide	Middle	15	4	minimal
3017174005	nitrofurazone	High	100	29	minimal
3017135022	chloramphenicol	High	1000	8	minimal
3017510009	ethionamide	Control	0	4	minimal
3017093022	monocrotaline	Control	0	15	control
3017648016	methapyrilene	High	100	8	slight
3017163013	chloramphenicol	Middle	300	15	minimal
3017095026	monocrotaline	Middle	10	29	slight
3017193004	amitriptyline	Control	0	8	control
3017648004	methapyrilene	High	100	4	slight
3017554004	ethionamide	Middle	100	4	minimal
3017192010	amitriptyline	High	150	15	slight
3017454010	benziodarone	Low	30	4	minimal
3017176024	imipramine	Control	0	29	control
3017096014	ethinylestradiol	Control	0	4	control
3017173026	nitrofurazone	Control	0	29	control
3017085005	ethinylestradiol	Control	0	29	control
3017534027	nitrosodiethylamine	High	30	15	moderate
3017511030	ethionamide	Middle	100	29	minimal
3017713015	naphthyl isothiocyanate	High	15	4	minimal
3017431027	fenofibrate	Control	0	8	control
3017487006	trimethadione	Control	0	4	control
3017708005	WY-14643	Low	10	29	minimal
3017609013	puromycin aminonucleoside	Middle	12	29	moderate
3017733025	coumarin	Control	0	4	control
3017216021	hydroxyzine	Control	0	15	control
3017095015	monocrotaline	Control	0	8	control
3017656022	ethionine	Control	0	15	control
3017748022	allopurinol	Control	0	8	control
3017202005	hydroxyzine	High	100	15	minimal
3017495011	fenofibrate	High	1000	15	moderate
3017083020	ethinylestradiol	Control	0	15	slight
3017192013	amitriptyline	Control	0	29	control
3017501024	trimethadione	High	500	4	slight
3017163008	chloramphenicol	Control	0	15	control
3017657001	ethionine	High	250	15	moderate
3017732029	phenytoin	High	600	8	slight
3017192002	amitriptyline	Control	0	15	control
3017399029	ethambutol	Control	0	29	control
3017211009	amitriptyline	Control	0	15	control
3017163012	chloramphenicol	Middle	300	15	minimal
3017535026	nitrosodiethylamine	Middle	10	29	minimal
3017016022	methyltestosterone	High	300	15	slight
3017759028	azathioprine	Control	0	29	control
3017135023	chloramphenicol	High	1000	8	minimal
3017648010	methapyrilene	Low	10	8	slight
3017457008	bendazac	Middle	100	8	minimal
3017431027	fenofibrate	Control	0	8	control
3017298022	diltiazem	High	800	8	minimal
3017454024	benziodarone	Low	30	8	minimal
3017734005	coumarin	High	150	4	minimal
3017759015	azathioprine	Control	0	15	control
3017398029	ethambutol	Middle	300	15	moderate
3017732019	phenytoin	Control	0	8	control
3017202018	hydroxyzine	High	100	29	moderate
3017728025	phenylbutazone	Middle	60	29	slight
3017510008	ethionamide	Control	0	4	minimal
3017478010	fenofibrate	Control	0	4	control
3017456020	bendazac	Control	0	4	control
3017733001	phenytoin	Control	0	15	control
3017728021	phenylbutazone	Control	0	29	control
3017709004	WY-14643	Control	0	4	control
3017399023	ethambutol	High	1000	8	severe
3017729027	phenylbutazone	Control	0	4	control
3017760010	azathioprine	High	30	15	slight
3017298013	diltiazem	Control	0	8	minimal
3017580004	puromycin aminonucleoside	Middle	12	15	moderate
3017083024	ethinylestradiol	Middle	3	15	minimal
3017734016	coumarin	High	150	8	minimal
3017455002	benziodarone	Middle	100	8	minimal
3017193005	amitriptyline	Low	15	8	minimal
3017733024	phenytoin	High	600	29	slight
3017428020	promethazine	High	200	4	minimal
3017086007	ethinylestradiol	Middle	3	29	minimal
3017708002	WY-14643	Control	0	29	minimal
3017457003	bendazac	Control	0	8	control
3017192015	amitriptyline	Control	0	29	control
3017095027	monocrotaline	Middle	10	29	slight
3017725001	gemfibrozil	Control	0	4	minimal
3017707021	WY-14643	Control	0	15	control
3017135014	chloramphenicol	Control	0	8	control
3017163007	chloramphenicol	Control	0	15	control
3017511020	ethionamide	High	300	15	slight
3017083018	ethinylestradiol	Control	0	15	slight
3017648007	methapyrilene	Control	0	8	control
3017017006	methyltestosterone	High	300	29	slight
3017532026	nitrosodiethylamine	Control	0	8	control
3017478010	fenofibrate	Control	0	4	control
3017708014	indomethacin	Control	0	15	control
3017648007	methapyrilene	Control	0	8	control
3017707020	WY-14643	Control	0	15	control
3017400004	ethambutol	Middle	300	29	slight
3017708001	WY-14643	Control	0	29	minimal
3017707020	WY-14643	Control	0	15	control
3017135024	chloramphenicol	High	1000	8	minimal
3017709012	WY-14643	Middle	30	4	slight
3017124021	iproniazid	High	60	29	slight
3017655022	ethionine	High	250	8	slight
3017408002	ethambutol	Control	0	15	control
3017016026	methyltestosterone	Control	0	29	control
3017747013	cyclophosphamide	High	15	29	slight
3017730005	phenylbutazone	High	200	4	minimal
3017495020	fenofibrate	Middle	100	29	moderate
3017163029	chloramphenicol	High	1000	29	slight
3017495010	fenofibrate	High	1000	15	moderate
3017713003	adapin	High	100	29	minimal
3017163027	chloramphenicol	High	1000	29	slight
3017457009	bendazac	Middle	100	8	minimal
3017399028	ethambutol	Control	0	29	control
3017095002	monocrotaline	Control	0	4	control
3017664026	thioacetamide	Control	0	4	control
3017211008	amitriptyline	High	150	8	minimal
3017648003	methapyrilene	High	100	4	slight
3017724010	gemfibrozil	Low	30	15	minimal
3017724011	gemfibrozil	Low	30	15	minimal
3017495014	fenofibrate	Control	0	29	control
3017510018	ethionamide	High	300	4	slight
3017708002	WY-14643	Control	0	29	minimal
3017733027	coumarin	Control	0	4	control
3017725003	gemfibrozil	Control	0	4	minimal
3017163018	chloramphenicol	Control	0	29	control
3017648013	methapyrilene	Middle	30	8	slight
3017086004	ethinylestradiol	Low	1	29	minimal
3017135015	chloramphenicol	Control	0	8	control
3017708007	WY-14643	Middle	30	29	slight
3017192009	amitriptyline	Middle	50	15	minimal
3017709008	WY-14643	Low	10	4	minimal
3017651002	methapyrilene	Control	0	15	control
3017733003	phenytoin	Control	0	15	control
3017300009	diltiazem	Control	0	15	control
3017096016	ethinylestradiol	Control	0	4	control
3017096025	ethinylestradiol	High	10	4	minimal
3017733013	phenytoin	Control	0	29	control
3017495001	fenofibrate	Control	0	15	control
3017094016	chlormezanone	Low	50	8	minimal
3017707023	WY-14643	Low	10	15	minimal
3017428012	promethazine	Low	20	4	minimal
3017083021	ethinylestradiol	Low	1	15	minimal
3017202017	hydroxyzine	High	100	29	moderate
3017733003	phenytoin	Control	0	15	control
3017708011	WY-14643	High	100	29	minimal
3017732028	phenytoin	High	600	8	slight
3017192008	amitriptyline	Middle	50	15	minimal
3017655011	ethionine	High	250	4	slight
3017707021	WY-14643	Control	0	15	control
3017176013	imipramine	Control	0	15	control
3017707021	WY-14643	Control	0	15	control
3017093028	monocrotaline	Middle	10	15	slight
3017651012	methapyrilene	Control	0	29	control
3017715016	amiodarone	Control	0	15	control
3017724013	gemfibrozil	Middle	100	15	minimal
3017651001	methapyrilene	Control	0	15	control
3017733014	phenytoin	Control	0	29	control
3017724012	gemfibrozil	Low	30	15	minimal
3017179026	naproxen	Control	0	4	control
3017192019	amitriptyline	Middle	50	29	slight
3017399029	ethambutol	Control	0	29	control
3017574001	puromycin aminonucleoside	Control	0	4	control
3017718029	hexachlorobenzene	Middle	100	4	minimal
3017202008	hydroxyzine	Control	0	29	control
3017709024	WY-14643	Middle	30	8	minimal
3017495005	fenofibrate	Low	10	15	minimal
3017454021	benziodarone	Control	0	8	minimal
3017192012	amitriptyline	High	150	15	slight
3017719004	hexachlorobenzene	High	300	4	minimal
3017647030	methapyrilene	Middle	30	4	slight
3017609010	puromycin aminonucleoside	Control	0	29	control
3017511021	ethionamide	High	300	15	slight
3017094017	chlormezanone	Low	50	8	minimal
3017739023	chlorpromazine	Control	0	29	control
3017733021	phenytoin	Middle	200	29	slight
3017456019	bendazac	Control	0	4	control
3017713016	naphthyl isothiocyanate	Control	0	8	control
3017016014	methyltestosterone	Control	0	15	control
3017086010	ethinylestradiol	High	10	29	moderate
3017651019	methapyrilene	Middle	30	29	slight
3017094025	monocrotaline	High	30	15	severe
3017176012	imipramine	Control	0	15	control
3017713025	naphthyl isothiocyanate	High	15	8	slight
3017733020	phenytoin	Middle	200	29	slight
3017163015	chloramphenicol	High	1000	15	slight
3017724017	gemfibrozil	High	300	15	minimal
3017454022	benziodarone	Low	30	8	minimal
3017719006	hexachlorobenzene	Control	0	8	control
3017083029	ethinylestradiol	High	10	15	slight
3017399022	ethambutol	High	1000	8	severe
3017724028	gemfibrozil	High	300	29	minimal
3017709016	WY-14643	Control	0	8	control
3017709018	WY-14643	Control	0	8	control
3017085006	ethinylestradiol	Control	0	29	control
3017718030	hexachlorobenzene	Middle	100	4	minimal
3017664025	thioacetamide	Control	0	4	control
3017192021	amitriptyline	Middle	50	29	slight
3017648014	methapyrilene	Middle	30	8	slight
3017554007	ethionamide	High	300	4	slight
3017202010	hydroxyzine	Control	0	29	control
3017655019	ethionine	Middle	80	8	minimal
3017105026	methyldopa	Control	0	4	control
3017191002	amitriptyline	Control	0	4	control
3017093020	monocrotaline	Control	0	15	control
3017648008	methapyrilene	Control	0	8	control
3017747003	cyclophosphamide	Control	0	29	slight
3017725012	gemfibrozil	High	300	4	slight
3017708003	WY-14643	Control	0	29	minimal
3017176019	imipramine	Middle	30	15	minimal
3017716007	amiodarone	High	200	29	minimal
3017707008	indomethacin	Control	0	8	control
3017657013	ethionine	High	250	29	minimal
3017651002	methapyrilene	Control	0	15	control
3017398030	ethambutol	Middle	300	15	moderate
3017096017	ethinylestradiol	Low	1	4	minimal
3017432003	fenofibrate	Middle	100	8	slight
3017454014	benziodarone	Middle	100	4	minimal
3017399026	ethambutol	High	1000	15	moderate
3017083026	ethinylestradiol	Middle	3	15	minimal
3017713006	naphthyl isothiocyanate	Control	0	4	control
3017725003	gemfibrozil	Control	0	4	minimal
3017665002	thioacetamide	Middle	15	4	minimal
3017712023	adapin	Control	0	29	control
3017724008	gemfibrozil	Control	0	15	control
3017173014	nitrofurazone	Control	0	15	minimal
3017651012	methapyrilene	Control	0	29	control
3017193011	amitriptyline	High	150	8	minimal
3017193004	amitriptyline	Control	0	8	control
3017300025	diltiazem	Middle	240	29	minimal
3017085006	ethinylestradiol	Control	0	29	control
3017715029	amiodarone	Control	0	29	control
3017657002	ethionine	Control	0	29	minimal
3017718028	hexachlorobenzene	Low	30	4	minimal
3017298014	diltiazem	Control	0	8	minimal
3017725023	gemfibrozil	High	300	8	minimal
3017095023	monocrotaline	High	30	8	slight
3017574022	puromycin aminonucleoside	High	40	8	slight
3017176028	imipramine	Middle	30	29	minimal
3017648012	methapyrilene	Middle	30	8	slight
3017733002	phenytoin	Control	0	15	control
3017708022	indomethacin	High	5	15	slight
3017454007	benziodarone	Control	0	4	minimal
3017724007	gemfibrozil	Control	0	15	control
3017708002	WY-14643	Control	0	29	minimal
3017651009	methapyrilene	High	100	15	slight
3017099024	ethinylestradiol	High	10	8	minimal
3017718025	hexachlorobenzene	Control	0	4	control
3017487016	trimethadione	High	500	4	slight
3017724027	gemfibrozil	Middle	100	29	minimal
3017095028	monocrotaline	Middle	10	29	slight
3017724008	gemfibrozil	Control	0	15	control
3017163008	chloramphenicol	Control	0	15	control
3017574014	puromycin aminonucleoside	Control	0	8	control
3017093021	monocrotaline	Control	0	15	control
3017399028	ethambutol	Control	0	29	control
3017086002	ethinylestradiol	Low	1	29	minimal
3017298015	diltiazem	Control	0	8	minimal
3017094027	monocrotaline	Control	0	29	control
3017093021	monocrotaline	Control	0	15	control
3017173015	nitrofurazone	Control	0	15	minimal
3017083018	ethinylestradiol	Control	0	15	slight
3017714008	naphthyl isothiocyanate	High	15	15	slight
3017534030	nitrosodiethylamine	Control	0	29	control
3017715027	amiodarone	High	200	15	minimal
3017424009	papaverine	Control	0	4	control
3017105024	methyldopa	Low	60	4	minimal
3017708008	WY-14643	Middle	30	29	slight
3017724009	gemfibrozil	Control	0	15	control
3017083019	ethinylestradiol	Control	0	15	slight
3017431016	fenofibrate	Control	0	4	control
3017457002	bendazac	Control	0	8	control
3017534028	nitrosodiethylamine	Control	0	29	control
3017656020	ethionine	Control	0	15	control
3017759025	azathioprine	High	30	15	slight
3017713026	naphthyl isothiocyanate	High	15	8	slight
3017707020	WY-14643	Control	0	15	control
3017094028	monocrotaline	Control	0	29	control
3017099025	ethinylestradiol	High	10	8	minimal
3017651011	methapyrilene	High	100	15	slight
3017495002	fenofibrate	Control	0	15	control
3017083027	ethinylestradiol	High	10	15	slight
3017708024	indomethacin	High	5	15	slight
3017656020	ethionine	Control	0	15	control
3017747012	cyclophosphamide	High	15	29	slight
3017173025	nitrofurazone	High	100	15	minimal
3017095010	monocrotaline	High	30	4	slight
3017399014	ethambutol	Control	0	8	control
3017431020	fenofibrate	Middle	100	4	minimal
3017105022	methyldopa	Low	60	4	minimal
3017085005	ethinylestradiol	Control	0	29	control
3017191005	amitriptyline	Low	15	4	minimal
3017534020	nitrosodiethylamine	Control	0	15	control
3017748026	allopurinol	Low	15	8	minimal
3017096015	ethinylestradiol	Control	0	4	control
3017428010	promethazine	Control	0	4	control
3017094008	chlormezanone	Middle	150	4	slight
3017495009	fenofibrate	Middle	100	15	slight
3017399019	ethambutol	Middle	300	8	slight
3017083019	ethinylestradiol	Control	0	15	slight
3017725001	gemfibrozil	Control	0	4	minimal
3017191003	amitriptyline	Control	0	4	control
3017300019	diltiazem	Control	0	29	control
3017609012	puromycin aminonucleoside	Middle	12	29	moderate
3017176014	imipramine	Control	0	15	control
3017454007	benziodarone	Control	0	4	minimal
3017707024	WY-14643	Low	10	15	minimal
3017664030	thioacetamide	Middle	15	4	minimal
3017656026	ethionine	Middle	80	15	minimal
3017732021	phenytoin	Control	0	8	control
3017724014	gemfibrozil	Middle	100	15	minimal
3017739023	chlorpromazine	Control	0	29	control
3017424018	papaverine	High	400	4	slight
3017651022	methapyrilene	High	100	29	slight
3017724024	gemfibrozil	Low	30	29	minimal
3017733015	phenytoin	Control	0	29	control
3017135021	chloramphenicol	Middle	300	8	minimal
3017554001	ethionamide	Control	0	4	minimal
3017708001	WY-14643	Control	0	29	minimal
3017665008	thioacetamide	Control	0	8	control
3017733013	phenytoin	Control	0	29	control
3017099017	ethinylestradiol	Control	0	8	minimal
3017173023	nitrofurazone	High	100	15	minimal
3017298023	diltiazem	High	800	8	minimal
3017456021	bendazac	Control	0	4	control
3017718025	hexachlorobenzene	Control	0	4	control
3017104028	lomustine	Control	0	15	control
3017707030	WY-14643	High	100	15	minimal
3017665007	thioacetamide	Control	0	8	control
3017733008	phenytoin	Middle	200	15	slight
3017495001	fenofibrate	Control	0	15	control
3017707027	WY-14643	Middle	30	15	minimal
3017174002	nitrofurazone	Middle	30	29	minimal
3017095012	monocrotaline	High	30	4	slight
3017665003	thioacetamide	High	45	4	slight
3017651014	methapyrilene	Control	0	29	control
3017648005	methapyrilene	High	100	4	slight
3017135015	chloramphenicol	Control	0	8	control
3017647024	methapyrilene	Control	0	4	control
3017016025	methyltestosterone	Control	0	29	control
3017105005	lomustine	High	6	15	minimal
3017503025	trimethadione	High	500	29	minimal
3017739025	chlorpromazine	Control	0	29	control
3017708006	WY-14643	Low	10	29	minimal
3017173027	nitrofurazone	Control	0	29	control
3017655013	ethionine	Control	0	8	slight
3017431014	fenofibrate	Control	0	4	control
3017104027	lomustine	Control	0	15	control
3017099015	ethinylestradiol	Control	0	8	minimal
3017095001	monocrotaline	Control	0	4	control
3017725009	gemfibrozil	Middle	100	4	minimal
3017094014	chlormezanone	Control	0	8	control
3017713018	naphthyl isothiocyanate	Control	0	8	control
3017648009	methapyrilene	Low	10	8	slight
3017495012	fenofibrate	High	1000	15	moderate
3017400006	ethambutol	Middle	300	29	slight
3017725002	gemfibrozil	Control	0	4	minimal
3017733002	phenytoin	Control	0	15	control
3017713002	adapin	High	100	29	minimal
3017725003	gemfibrozil	Control	0	4	minimal
3017454013	benziodarone	Middle	100	4	minimal
3017173028	nitrofurazone	Control	0	29	control
3017179023	chloramphenicol	Control	0	29	control
3017715028	amiodarone	Control	0	29	control
3017510030	ethionamide	High	300	8	slight
3017428019	promethazine	High	200	4	minimal
3017747004	cyclophosphamide	Control	0	29	slight
3017655014	ethionine	Control	0	8	slight
3017657012	ethionine	High	250	29	minimal
3017456019	bendazac	Control	0	4	control
3017707019	WY-14643	Control	0	15	control
3017718023	hexachlorobenzene	Control	0	4	control
3017300020	diltiazem	Control	0	29	control
3017400009	ethambutol	High	1000	29	moderate
3017651016	methapyrilene	Low	10	29	slight
3017736020	coumarin	Control	0	29	control
3017094007	chlormezanone	Middle	150	4	slight
3017105018	lomustine	High	6	29	slight
3017713001	adapin	High	100	29	minimal
3017173028	nitrofurazone	Control	0	29	control
3017016027	methyltestosterone	Control	0	29	control
3017399020	ethambutol	Middle	300	8	slight
3017718023	hexachlorobenzene	Control	0	4	control
3017095013	monocrotaline	Control	0	8	control
3017456021	bendazac	Control	0	4	control
3017554006	ethionamide	High	300	4	slight
3017202019	hydroxyzine	High	100	29	moderate
3017193008	amitriptyline	Middle	50	8	minimal
3017733010	phenytoin	High	600	15	moderate
3017651007	methapyrilene	Middle	30	15	slight
3017554008	ethionamide	Control	0	8	minimal
3017713017	naphthyl isothiocyanate	Control	0	8	control
3017424010	papaverine	Control	0	4	control
3017193003	amitriptyline	Control	0	8	control
3017105025	methyldopa	Control	0	4	control
3017096019	ethinylestradiol	Low	1	4	minimal
3017709016	WY-14643	Control	0	8	control
3017192002	amitriptyline	Control	0	15	control
3017099022	ethinylestradiol	Middle	3	8	minimal
3017096021	ethinylestradiol	Middle	3	4	minimal
3017454009	benziodarone	Control	0	4	minimal
3017715030	amiodarone	Control	0	29	control
3017609005	puromycin aminonucleoside	Control	0	15	control
3017648007	methapyrilene	Control	0	8	control
3017759024	azathioprine	High	30	15	slight
3017300013	diltiazem	Middle	240	15	minimal
3017105025	methyldopa	Control	0	4	control
3017736009	coumarin	Control	0	15	control
3017173027	nitrofurazone	Control	0	29	control
3017714007	naphthyl isothiocyanate	High	15	15	slight
3017725022	gemfibrozil	High	300	8	minimal
3017300019	diltiazem	Control	0	29	control
3017018001	methyltestosterone	High	300	15	slight
3017431016	fenofibrate	Control	0	4	control
3017718023	hexachlorobenzene	Control	0	4	control
3017456021	bendazac	Control	0	4	control
3017202009	hydroxyzine	Control	0	29	control
3017135020	chloramphenicol	Middle	300	8	minimal
3017192007	amitriptyline	Middle	50	15	minimal
3017192014	amitriptyline	Control	0	29	control
3017759029	azathioprine	Control	0	29	control
3017733012	phenytoin	High	600	15	moderate
3017511013	ethionamide	Control	0	15	minimal
3017759027	azathioprine	Control	0	29	control
3017454015	benziodarone	Middle	100	4	minimal
3017163018	chloramphenicol	Control	0	29	control
3017709017	WY-14643	Control	0	8	control
3017709006	WY-14643	Control	0	4	control
3017734004	coumarin	High	150	4	minimal
3017728019	phenylbutazone	Control	0	29	control
3017554009	ethionamide	Control	0	8	minimal
3017093026	monocrotaline	Middle	10	15	slight
3017655024	ethionine	High	250	8	slight
3017655010	ethionine	High	250	4	slight
3017657011	ethionine	High	250	29	minimal
3017398028	ethambutol	Middle	300	15	moderate
3017724019	gemfibrozil	Control	0	29	minimal
3017719007	hexachlorobenzene	Control	0	8	control
3017408001	ethambutol	Control	0	15	control
3017094026	monocrotaline	Control	0	29	control
3017192024	amitriptyline	High	150	29	moderate
3017725015	gemfibrozil	Control	0	8	minimal
3017510020	ethionamide	Control	0	8	minimal
3017456025	bendazac	Middle	100	4	minimal
3017707019	WY-14643	Control	0	15	control
3017456022	bendazac	Low	30	4	minimal
3017733019	phenytoin	Middle	200	29	slight
3017203016	imipramine	Control	0	29	control
3017707018	indomethacin	High	5	8	slight
3017655021	ethionine	Middle	80	8	minimal
3017651014	methapyrilene	Control	0	29	control
3017174007	nitrofurazone	High	100	29	minimal
3017707025	WY-14643	Middle	30	15	minimal
3017535027	nitrosodiethylamine	Middle	10	29	minimal
3017713030	naphthyl isothiocyanate	Control	0	15	control
3017454011	benziodarone	Low	30	4	minimal
3017094015	chlormezanone	Control	0	8	control
3017400005	ethambutol	Middle	300	29	slight
3017665004	thioacetamide	High	45	4	slight
3017724009	gemfibrozil	Control	0	15	control
3017495002	fenofibrate	Control	0	15	control
3017760004	azathioprine	Middle	10	29	slight
3017399027	ethambutol	High	1000	15	moderate
3017495003	fenofibrate	Control	0	15	control
3017216017	lomustine	Control	0	29	control
3017651014	methapyrilene	Control	0	29	control
3017511012	ethionamide	Control	0	15	minimal
3017648008	methapyrilene	Control	0	8	control
3017580013	puromycin aminonucleoside	Middle	12	29	moderate
3017748025	allopurinol	Low	15	8	minimal
3017166003	naproxen	Control	0	4	control
3017708010	WY-14643	High	100	29	minimal
3017724023	gemfibrozil	Low	30	29	minimal
3017166011	naproxen	High	60	4	slight
3017656021	ethionine	Control	0	15	control
3017093029	monocrotaline	High	30	15	severe
3017574003	puromycin aminonucleoside	Control	0	4	control
3017099016	ethinylestradiol	Control	0	8	minimal
3017655013	ethionine	Control	0	8	slight
3017432006	fenofibrate	High	1000	8	slight
3017017005	methyltestosterone	High	300	29	slight
3017709005	WY-14643	Control	0	4	control
3017495015	fenofibrate	Control	0	29	control
3017709017	WY-14643	Control	0	8	control
3017760003	azathioprine	Middle	10	29	slight
3017203015	imipramine	Middle	30	15	minimal
3017192011	amitriptyline	High	150	15	slight
3017017004	methyltestosterone	High	300	29	slight
3017202006	hydroxyzine	High	100	15	minimal
3017201027	hydroxyzine	Control	0	15	control
3017648017	methapyrilene	High	100	8	slight
3017456030	bendazac	High	300	4	slight
3017712024	adapin	Control	0	29	control
3017163025	chloramphenicol	Middle	300	29	slight
3017399030	ethambutol	Control	0	29	control
3017665014	thioacetamide	Middle	15	8	minimal
3017510014	ethionamide	Middle	100	4	minimal
3017096014	ethinylestradiol	Control	0	4	control
3017424011	papaverine	Control	0	4	control
3017709018	WY-14643	Control	0	8	control
3017428011	promethazine	Control	0	4	control
3017724018	gemfibrozil	High	300	15	minimal
3017094001	chlormezanone	Control	0	4	control
3017655015	ethionine	Control	0	8	slight
3017651017	methapyrilene	Low	10	29	slight
3017456027	bendazac	Middle	100	4	minimal
3017511001	ethionamide	High	300	8	slight
3017104026	lomustine	Control	0	15	control
3017651023	methapyrilene	High	100	29	slight
3017729025	phenylbutazone	Control	0	4	control
3017716009	amiodarone	High	200	29	minimal
3017193002	amitriptyline	Control	0	8	control
3017300028	diltiazem	High	800	29	minimal
3017651013	methapyrilene	Control	0	29	control
3017495016	fenofibrate	Low	10	29	minimal
3017708009	WY-14643	Middle	30	29	slight
3017510028	ethionamide	Middle	100	8	slight
3017713014	naphthyl isothiocyanate	High	15	4	minimal
3017739021	chlorpromazine	High	45	15	slight
3017201028	hydroxyzine	Control	0	15	control
3017647025	methapyrilene	Control	0	4	control
3017300021	diltiazem	Control	0	29	control
3017736028	coumarin	High	150	29	minimal
3017648002	methapyrilene	Middle	30	4	slight
3017609009	puromycin aminonucleoside	Control	0	29	control
3017095024	monocrotaline	High	30	8	slight
3017724020	gemfibrozil	Control	0	29	minimal
3017724021	gemfibrozil	Control	0	29	minimal
3017495003	fenofibrate	Control	0	15	control
3017724019	gemfibrozil	Control	0	29	minimal
3017718026	hexachlorobenzene	Low	30	4	minimal
3017707016	indomethacin	High	5	8	slight
3017176023	imipramine	Control	0	29	control
3017105010	lomustine	Control	0	29	control
3017135013	chloramphenicol	Control	0	8	control
3017193003	amitriptyline	Control	0	8	control
3017016015	methyltestosterone	Control	0	15	control
3017712022	adapin	Control	0	29	control
3017725008	gemfibrozil	Middle	100	4	minimal
3017399013	ethambutol	Control	0	8	control
3017708001	WY-14643	Control	0	29	minimal
3017086001	ethinylestradiol	Control	0	29	control
3017707029	WY-14643	High	100	15	minimal
3017503026	trimethadione	High	500	29	minimal
3017709020	WY-14643	Low	10	8	minimal
3017457007	bendazac	Middle	100	8	minimal
3017501019	trimethadione	Control	0	4	control
3017715017	amiodarone	Control	0	15	control
3017715018	amiodarone	Control	0	15	control
3017759017	azathioprine	Control	0	15	control
3017733022	phenytoin	High	600	29	slight
3017647025	methapyrilene	Control	0	4	control
3017739022	chlorpromazine	High	45	15	slight
3017707017	indomethacin	High	5	8	slight
3017495003	fenofibrate	Control	0	15	control
3017094002	chlormezanone	Control	0	4	control
3017728020	phenylbutazone	Control	0	29	control
3017431026	fenofibrate	Control	0	8	control
3017748023	allopurinol	Control	0	8	control
3017655012	ethionine	High	250	4	slight
3017734009	coumarin	Control	0	8	control
3017096015	ethinylestradiol	Control	0	4	control
3017105027	methyldopa	Control	0	4	control
3017707019	WY-14643	Control	0	15	control
3017719014	hexachlorobenzene	High	300	8	minimal
3017455003	benziodarone	Middle	100	8	minimal
3017655009	ethionine	Middle	80	4	minimal
3017511024	ethionamide	Control	0	29	minimal
3017713013	naphthyl isothiocyanate	High	15	4	minimal
3017730006	phenylbutazone	High	200	4	minimal
3017656030	ethionine	High	250	15	moderate
3017456020	bendazac	Control	0	4	control
3017300021	diltiazem	Control	0	29	control
3017454019	benziodarone	Control	0	8	minimal
3017086003	ethinylestradiol	Low	1	29	minimal
3017736030	coumarin	High	150	29	minimal
3017193009	amitriptyline	Middle	50	8	minimal
3017105023	methyldopa	Low	60	4	minimal
3017163019	chloramphenicol	Control	0	29	control
3017718024	hexachlorobenzene	Control	0	4	control
3017760005	azathioprine	Middle	10	29	slight
3017083020	ethinylestradiol	Control	0	15	slight
3017713027	naphthyl isothiocyanate	High	15	8	slight
3017300018	diltiazem	High	800	15	minimal
3017163024	chloramphenicol	Middle	300	29	slight
3017741001	chlorpromazine	High	45	29	slight
3017428009	promethazine	Control	0	4	control
3017718024	hexachlorobenzene	Control	0	4	control
3017739012	chlorpromazine	Control	0	15	control
3017495006	fenofibrate	Low	10	15	minimal
3017609004	puromycin aminonucleoside	Control	0	15	control
3017174003	nitrofurazone	Middle	30	29	minimal
3017495004	fenofibrate	Low	10	15	minimal
3017709006	WY-14643	Control	0	4	control
3017300029	diltiazem	High	800	29	minimal
3017099021	ethinylestradiol	Middle	3	8	minimal
3017665006	thioacetamide	Control	0	8	control
3017135019	chloramphenicol	Middle	300	8	minimal
3017713005	naphthyl isothiocyanate	Control	0	4	control
3017656021	ethionine	Control	0	15	control
3017095003	monocrotaline	Control	0	4	control
3017650030	methapyrilene	Control	0	15	control
3017016013	methyltestosterone	Control	0	15	control
3017192023	amitriptyline	High	150	29	moderate
3017096020	ethinylestradiol	Middle	3	4	minimal
3017655014	ethionine	Control	0	8	slight
3017456028	bendazac	High	300	4	slight
3017095011	monocrotaline	High	30	4	slight
3017192015	amitriptyline	Control	0	29	control
3017647026	methapyrilene	Control	0	4	control
3017399030	ethambutol	Control	0	29	control
3017432005	fenofibrate	High	1000	8	slight
3017651021	methapyrilene	High	100	29	slight
3017099023	ethinylestradiol	Middle	3	8	minimal
3017192014	amitriptyline	Control	0	29	control
3017124023	iproniazid	High	60	29	slight
3017651001	methapyrilene	Control	0	15	control
3017724015	gemfibrozil	Middle	100	15	minimal
3017166010	naproxen	High	60	4	slight
3017719016	hexachlorobenzene	High	300	8	minimal
3017094009	chlormezanone	Middle	150	4	slight
3017105021	methyldopa	Middle	200	4	minimal
3017574010	puromycin aminonucleoside	High	40	4	slight
3017709007	WY-14643	Low	10	4	minimal
3017086005	ethinylestradiol	Middle	3	29	minimal
3017163016	chloramphenicol	High	1000	15	slight
3017724026	gemfibrozil	Middle	100	29	minimal
3017665013	thioacetamide	Middle	15	8	minimal
3017432002	fenofibrate	Middle	100	8	slight
3017431025	fenofibrate	High	1000	4	minimal
3017655002	ethionine	Control	0	4	minimal
3017511029	ethionamide	Middle	100	29	minimal
3017709016	WY-14643	Control	0	8	control
3017399024	ethambutol	High	1000	8	severe
3017095022	monocrotaline	High	30	8	slight
3017574024	puromycin aminonucleoside	High	40	8	slight
3017651018	methapyrilene	Middle	30	29	slight
3017093022	monocrotaline	Control	0	15	control
3017665012	thioacetamide	Middle	15	8	minimal
3017501018	trimethadione	Control	0	4	control
3017650030	methapyrilene	Control	0	15	control
3017709004	WY-14643	Control	0	4	control
3017648006	methapyrilene	Control	0	8	control
3017399013	ethambutol	Control	0	8	control
3017724007	gemfibrozil	Control	0	15	control
3017099026	ethinylestradiol	High	10	8	minimal
3017431022	fenofibrate	Middle	100	4	minimal
3017554008	ethionamide	Control	0	8	minimal
3017736018	coumarin	High	150	15	minimal
3017535028	nitrosodiethylamine	Middle	10	29	minimal
3017655007	ethionine	Middle	80	4	minimal
3017300020	diltiazem	Control	0	29	control
3017708023	indomethacin	High	5	15	slight
3017656028	ethionine	Middle	80	15	minimal
3017454023	benziodarone	Low	30	8	minimal
3017193012	amitriptyline	High	150	8	minimal
3017609011	puromycin aminonucleoside	Control	0	29	control
3017656027	ethionine	Middle	80	15	minimal
3017163019	chloramphenicol	Control	0	29	control
3017456019	bendazac	Control	0	4	control
3017657003	ethionine	Control	0	29	minimal
3017300008	diltiazem	Control	0	15	control
3017135014	chloramphenicol	Control	0	8	control
3017716008	amiodarone	High	200	29	minimal
3017733011	phenytoin	High	600	15	moderate
3017454021	benziodarone	Control	0	8	minimal
3017193002	amitriptyline	Control	0	8	control
3017724029	gemfibrozil	High	300	29	minimal
3017730004	phenylbutazone	High	200	4	minimal
3017300008	diltiazem	Control	0	15	control
3017724021	gemfibrozil	Control	0	29	minimal
3017534029	nitrosodiethylamine	Control	0	29	control
3017708013	indomethacin	Control	0	15	control
3017099015	ethinylestradiol	Control	0	8	minimal
3017300030	diltiazem	High	800	29	minimal
3017739011	chlorpromazine	Control	0	15	control
3017083020	ethinylestradiol	Control	0	15	slight
3017739024	chlorpromazine	Control	0	29	control
3017733026	coumarin	Control	0	4	control
3017724019	gemfibrozil	Control	0	29	minimal
3017719015	hexachlorobenzene	High	300	8	minimal
3017707022	WY-14643	Low	10	15	minimal
3017105027	methyldopa	Control	0	4	control
3017729026	phenylbutazone	Control	0	4	control
3017495002	fenofibrate	Control	0	15	control
3017454008	benziodarone	Control	0	4	minimal
3017193006	amitriptyline	Low	15	8	minimal
3017708004	WY-14643	Low	10	29	minimal
3017495024	fenofibrate	High	1000	29	moderate
3017728026	phenylbutazone	Middle	60	29	slight
3017096014	ethinylestradiol	Control	0	4	control
3017719002	hexachlorobenzene	High	300	4	minimal
3017719001	hexachlorobenzene	Middle	100	4	minimal
3017655003	ethionine	Control	0	4	minimal
3017456021	bendazac	Control	0	4	control
3017163006	chloramphenicol	Control	0	15	control
3017725006	gemfibrozil	Low	30	4	slight
3017715026	amiodarone	High	200	15	minimal
3017655001	ethionine	Control	0	4	minimal
3017736021	coumarin	Control	0	29	control
3017648006	methapyrilene	Control	0	8	control
3017456019	bendazac	Control	0	4	control
3017495013	fenofibrate	Control	0	29	control
3017211009	amitriptyline	Control	0	15	control
3017664026	thioacetamide	Control	0	4	control
3017736019	coumarin	Control	0	29	control
3017709011	WY-14643	Middle	30	4	slight
3017709005	WY-14643	Control	0	4	control
3017495013	fenofibrate	Control	0	29	control
3017193003	amitriptyline	Control	0	8	control
3017511023	ethionamide	Control	0	29	minimal
3017086008	ethinylestradiol	High	10	29	moderate
3017431014	fenofibrate	Control	0	4	control
3017135013	chloramphenicol	Control	0	8	control
3017733009	phenytoin	Middle	200	15	slight
3017083018	ethinylestradiol	Control	0	15	slight
3017193007	amitriptyline	Low	15	8	minimal
3017719005	hexachlorobenzene	Control	0	8	control
3017105028	methyldopa	Middle	200	4	minimal
3017725002	gemfibrozil	Control	0	4	minimal
3017428018	promethazine	High	200	4	minimal
3017574013	puromycin aminonucleoside	Control	0	8	control
3017709025	WY-14643	High	100	8	minimal
3017725011	gemfibrozil	High	300	4	slight
3017739020	chlorpromazine	High	45	15	slight
3017086001	ethinylestradiol	Control	0	29	control
3017202007	hydroxyzine	High	100	15	minimal
3017495007	fenofibrate	Middle	100	15	slight
3017495019	fenofibrate	Middle	100	29	moderate
3017740001	chlorpromazine	Middle	15	29	minimal
3017096023	ethinylestradiol	High	10	4	minimal
3017718024	hexachlorobenzene	Control	0	4	control
3017534019	nitrosodiethylamine	Control	0	15	control
3017725001	gemfibrozil	Control	0	4	minimal
3017431023	fenofibrate	High	1000	4	minimal
3017085006	ethinylestradiol	Control	0	29	control
3017709010	WY-14643	Middle	30	4	slight
3017665005	thioacetamide	High	45	4	slight
3017174004	nitrofurazone	Middle	30	29	minimal
3017163026	chloramphenicol	Middle	300	29	slight
3017163007	chloramphenicol	Control	0	15	control
3017734007	coumarin	Control	0	8	control
3017495008	fenofibrate	Middle	100	15	slight
3017428013	promethazine	Low	20	4	minimal
3017554001	ethionamide	Control	0	4	minimal
3017733001	phenytoin	Control	0	15	control
3017300027	diltiazem	Middle	240	29	minimal
3017725024	gemfibrozil	High	300	8	minimal
3017739025	chlorpromazine	Control	0	29	control
3017533006	nitrosodiethylamine	High	30	8	minimal
3017748021	allopurinol	Control	0	8	control
3017574023	puromycin aminonucleoside	High	40	8	slight
3017664024	thioacetamide	Control	0	4	control
3017124022	iproniazid	High	60	29	slight
3017734017	coumarin	High	150	8	minimal
3017651006	methapyrilene	Middle	30	15	slight
3017086006	ethinylestradiol	Middle	3	29	minimal
3017096016	ethinylestradiol	Control	0	4	control
3017105017	lomustine	High	6	29	slight
3017736016	coumarin	High	150	15	minimal
3017655023	ethionine	High	250	8	slight
3017424019	papaverine	High	400	4	slight
3017456023	bendazac	Low	30	4	minimal
3017105019	lomustine	High	6	29	slight
3017707028	WY-14643	High	100	15	minimal
3017651013	methapyrilene	Control	0	29	control
3017609008	puromycin aminonucleoside	Middle	12	15	moderate
3017725007	gemfibrozil	Middle	100	4	minimal
3017734006	coumarin	High	150	4	minimal
3017748024	allopurinol	Low	15	8	minimal
3017739030	chlorpromazine	Middle	15	29	minimal
3017398024	ethambutol	Control	0	15	control
3017163017	chloramphenicol	High	1000	15	slight
3017511028	ethionamide	Middle	100	29	minimal
3017709009	WY-14643	Low	10	4	minimal
3017495021	fenofibrate	Middle	100	29	moderate
3017664024	thioacetamide	Control	0	4	control
3017709021	WY-14643	Low	10	8	minimal
3017431028	fenofibrate	Control	0	8	control
3017454008	benziodarone	Control	0	4	minimal
3017099016	ethinylestradiol	Control	0	8	minimal
3017399025	ethambutol	High	1000	15	moderate
3017300014	diltiazem	Middle	240	15	minimal
3017105008	lomustine	Control	0	29	control
3017166002	naproxen	Control	0	4	control
3017647024	methapyrilene	Control	0	4	control
3017300017	diltiazem	High	800	15	minimal
3017651012	methapyrilene	Control	0	29	control
3017193004	amitriptyline	Control	0	8	control
3017456024	bendazac	Low	30	4	minimal
3017192001	amitriptyline	Control	0	15	control
3017533007	nitrosodiethylamine	High	30	8	minimal
3017495015	fenofibrate	Control	0	29	control
3017173026	nitrofurazone	Control	0	29	control
3017747014	cyclophosphamide	High	15	29	slight
3017708012	WY-14643	High	100	29	minimal
3017724022	gemfibrozil	Low	30	29	minimal
3017725005	gemfibrozil	Low	30	4	slight
3017741002	chlorpromazine	High	45	29	slight
3017709022	WY-14643	Middle	30	8	minimal
3017511011	ethionamide	Control	0	15	minimal
3017708003	WY-14643	Control	0	29	minimal
3017709027	WY-14643	High	100	8	minimal
3017495015	fenofibrate	Control	0	29	control
3017647026	methapyrilene	Control	0	4	control
3017725014	gemfibrozil	Control	0	8	minimal
3017708015	indomethacin	Control	0	15	control
3017651015	methapyrilene	Low	10	29	slight
3017094013	chlormezanone	Control	0	8	control
3017428014	promethazine	Low	20	4	minimal
3017724021	gemfibrozil	Control	0	29	minimal
3017300009	diltiazem	Control	0	15	control
3017651008	methapyrilene	Middle	30	15	slight
3017083025	ethinylestradiol	Middle	3	15	minimal
3017454020	benziodarone	Control	0	8	minimal
3017733007	phenytoin	Middle	200	15	slight
3017095014	monocrotaline	Control	0	8	control
3017579029	puromycin aminonucleoside	Control	0	15	control
3017725013	gemfibrozil	Control	0	8	minimal
3017532028	nitrosodiethylamine	Control	0	8	control
3017456024	bendazac	Low	30	4	minimal
3017431021	fenofibrate	Middle	100	4	minimal
3017093020	monocrotaline	Control	0	15	control
3017399021	ethambutol	Middle	300	8	slight
3017173024	nitrofurazone	High	100	15	minimal
3017432004	fenofibrate	Middle	100	8	slight
3017400008	ethambutol	High	1000	29	moderate
3017191004	amitriptyline	Control	0	4	control
3017733023	phenytoin	High	600	29	slight
3017651020	methapyrilene	Middle	30	29	slight
3017725010	gemfibrozil	High	300	4	slight
3017510009	ethionamide	Control	0	4	minimal
3017093030	monocrotaline	High	30	15	severe
3017648011	methapyrilene	Low	10	8	slight
3017724007	gemfibrozil	Control	0	15	control
3017085005	ethinylestradiol	Control	0	29	control
3017709026	WY-14643	High	100	8	minimal
3017655008	ethionine	Middle	80	4	minimal
3017740002	chlorpromazine	High	45	29	slight
3017455001	benziodarone	Middle	100	8	minimal
3017083023	ethinylestradiol	Low	1	15	minimal
3017724025	gemfibrozil	Middle	100	29	minimal
3017431026	fenofibrate	Control	0	8	control
3017512001	ethionamide	High	300	15	slight
3017192001	amitriptyline	Control	0	15	control
3017510020	ethionamide	Control	0	8	minimal
3017510008	ethionamide	Control	0	4	minimal
3017709017	WY-14643	Control	0	8	control
3017709019	WY-14643	Low	10	8	minimal
3017651010	methapyrilene	High	100	15	slight
